# Supplementary material for: Combined Computational and Experimental Studies of Anabasine Encapsulation by Beta-Cyclodextrin
Source: MDPI journal article supplement (doi:10.3390/plants11172283), 2022-08-31
Supplement: s1 [file s1]

## Supporting data

**Zeinolla Muldakhmetov<sup>1</sup>, Serik Fazylov<sup>\*1,2</sup>, Oral Nurkenov<sup>1,2</sup>, Arstan Gazaliev<sup>1</sup>, Akmaral Sarsenbekova<sup>2</sup>, Irina Pustolaikina<sup>2</sup>, Zhangel'dy Nurmaganbetov<sup>1</sup>, Olzhas Seilkhanov<sup>3</sup>, Aisha A. Alsfouk<sup>4</sup>, Eslam B. Elkaeed<sup>5</sup>, Ibrahim H. Eissa<sup>6</sup>, Ahmed M. Metwaly<sup>\*7,8</sup>**

<sup>1</sup> Institute of Organic Synthesis and Coal Chemistry, Karaganda100012, Kazakhstan;

<sup>2</sup> Karagandy University of the name of academician E.A. Buketov 100024, Kazakhstan;

<sup>3</sup> Sh. Ualikhanov Kokshetau University, Kokshetau 020000, Kazakhstan

<sup>4</sup> Department of Pharmaceutical Sciences, College of Pharmacy, Princess Nourah bint Abdulrahman University, P.O. Box 84428, Riyadh 11671, Saudi Arabia

<sup>5</sup>Department of Pharmaceutical Sciences, College of Pharmacy, AlMaarefa University, Riyadh 13713, Saudi Arabia

<sup>6</sup> Pharmaceutical Medicinal Chemistry & Drug Design Department, Faculty of Pharmacy (Boys), Al-Azhar University, Cairo11884, Egypt

<sup>7</sup> Pharmacognosy and Medicinal Plants Department, Faculty of Pharmacy (Boys), Al-Azhar University, Cairo 11884, Egypt

<sup>8</sup>Biopharmaceutical Product Research Department, Genetic Engineering and Biotechnology Research Institute, City of Scientific Research and Technological Applications, Alexandria 21934, Egypt

# Method

## **1. Molecular Modeling studies**

### **1.1. Geometric parameters of $\alpha$ -, $\beta$ -, $\gamma$ -cyclodextrins and anabesine**

Ana:CD was performed by the MM<sup>+</sup> molecular mechanics method using the HyperChem 8.0 program. The chemical structures were taken from the PubChem Substance and Compound database ([pubchem.ncbi.nlm.nih.gov](http://pubchem.ncbi.nlm.nih.gov)). Chemical structure unique identifiers are: CID 444041 for  $\beta$ -cyclodextrin, and CID 205586 for anabesine. The geometry of the complexes was optimized by the MM<sup>+</sup> method. All calculations were carried out without taking into account the effect of the solvent (gas phase, vacuum).

### **1.2.Preparation of the $\alpha$ , $\beta$ , and $\gamma$ CD structure**

The 3D crystal structures of the  $\alpha$ ,  $\beta$ , and  $\gamma$  CD were extracted from the cyclo/maltodextrin/alpha-cyclodextrin complex, beta-cyclodextrin complex, and gamma cyclodextrin complex, respectively. These complexes were retrieved from RCSB Protein Data Bank with PDB IDs of 2ZYM (resolution 1.80 Å), 1BFN (resolution 2.07 Å), and 1p2g (resolution 2.30 Å), respectively. The docking analyses were performed using Discovery Studio 4.0 software to evaluate the free energies and binding mode of Roseofungin molecule with the core site of  $\alpha$ ,  $\beta$ , and  $\gamma$  CD. The most promising pose were selected depending the increased binding free energy ( $\Delta G$ ).

The 3D crystal structures of  $\alpha$ ,  $\beta$ , and  $\gamma$  CD were prepared by selecting  $\alpha$ ,  $\beta$ , and  $\gamma$  CD subunits and removing protein and all water molecules, heteroatoms and co-factors. Moreover, the correction of uncorrected valence atoms and crystallographic disorders were performed using alternate conformations and valence monitor options. Then, the  $\alpha$ ,  $\beta$ , and  $\gamma$  CD were protonated and its inflexibility was obtained by creating fixed atom constraint. Next, the energy was minimized by applying CHARMM (Chemistry at HARvard Macromolecular Mechanics) force fields, and MMFF94 (Merck Molecular force field) force field for charge and partial charge, respectively[4]. The binding sites of the  $\alpha$ ,  $\beta$ , and  $\gamma$  CD were defined as receptor molecules and prepared for docking.

### **1.3.Preparation of ligand**

The 2D structure of anabazine alkaloid molecule was sketched using ChemBioDraw Ultra 14.0 and saved in MDL-SD file format. Then, the SD file was opened (by Discovery studio 4.0 software) and protonated. Force fields were applied on the molecule to get lowest energy minimum structure via CHARMM and MMFF94 force fields for charge and partial charge, respectively. Then, each of them was prepared for docking by applying ligand preparation protocol.

#### **1.4. Docking simulation**

The docking is a technique that can reliably predict the preferred configuration of one molecule relative to another molecule when they are bound to each other to form a stable complex. The evaluation of generated poses was mainly based on the number of interactions they formed with the residues of active site upon binding.

The molecular docking of anabazine alkaloid was performed using CDOCKER protocol which is an implementation of the CDOCKER algorithm. CDOCKER is a grid-based molecular docking method that employs CHARMM-based molecular dynamics (MD) scheme to dock ligands into a receptor binding site. The default values were selected for the CDOCKER protocol. The CDOCKER energy (receptor-ligand interaction energy) of best docked poses was calculated.

#### **1.5. Molecular dynamics simulations**

Molecular dynamics simulation of the protein-ligand complexes was performed using GROMACS 2021.1 version and Linux 5.4 package. The GROMOS96 54a7 forcefield was selected as the force field for proteins and the ligand topologies were generated from the PRODRG<sup>2</sup> server. All the complexes were solvated using simple point charge (SPC) water molecules in a rectangular box. To make the simulation system electrically neutral, required number of Na<sup>+</sup> and Cl<sup>-</sup> ions were added while 0.15 mol/L salt concentrations were set in all the systems. Using the steepest descent method, all the solvated systems were subjected to energy minimization for 5000 steps. Afterwards, NVT (constant number of particles, volume, and temperature) series, NPT (constant number of particles, pressure, and temperature) series, and the production run were conducted in the MD simulation. The NVT and the NPT series were conducted at a 300 K temperature and 1 atm pressure for the duration of 300 ps. V-rescale thermostat and Parrinello-Rahman barostat were selected for the performed simulation. Finally, the production run was performed at 300 K for a duration of 100 ns (nanoseconds). Thereafter, a comparative analysis was performed measuring root mean square deviation (RMSD), root mean square fluctuation (RMSF), radius of gyration (Rg), solvent accessible surface area (SASA) and hydrogen bonds to analyze their stability. The Xmgrace program was used to represent the analyses in the form of plots.

## **2. Complex preparation**

The following reagents were used in the experiments:

- anabazine (2-(3-pyridyl)piperidine) (98,5%) («Aldrich»), base was used in the work, which is a light yellowish oil, with 1.01 g/cm<sup>3</sup> density, and 162.23 g/mol molar mass.

-  $\beta$ -cyclodextrin (99.5%) («Fluka»), white crystalline substance, t.p. 280-299°C, soluble in water when heated, well soluble in dimethylsulfoxide and pyridine.

Anabazine inclusion complexes with  $\beta$ -CD were obtained by co-dissolution. Calculated amounts of anabazine and  $\beta$ -CD (mmol) in molar ratios (1:1; 1:2; 1:3) dissolved in a minimum amount of a mixture of solvents water:ethanol (1:1). The solutions were stirred on a magnetic stirrer at 50 ° C for 5 hours. The dropped product was filtered, washed with acetone and dried at a temperature of 30-35°C. Inclusion complexes Ana: $\beta$ -CD were obtained in the form of a white crystalline powder melting with decomposition at 280-310°C.

### **3. Spectroscopic measurments**

The IR spectra of the inclusion complexes Ana: $\beta$ -CD were taken on a Cary 600 Series IR Fourier spectrometer manufactured by Agilent Technologies (USA). The <sup>1</sup>H and <sup>13</sup>C NMR spectra of the obtained clathrates were recorded on a JNM-ECA Jeol 400 spectrometer (frequency 399.78 MHz, DMSO-d<sub>6</sub>).

### **4. Surface morphology**

The surface morphology of the samples of the inclusion complexes was studied using a scanning electron microscope (SEM) from Tescon Mira3 LMN (Czech Republic).

### **5. Thermal analysis**

Thermal analysis of samples of Ana: $\beta$ -CD complexes (12 mg sample *weight*) was carried out by differential thermogravimetry (DTG) and scanning calorimetry (DSC) on a Setaram DTA/DSC calorimeter.

## Supplementary

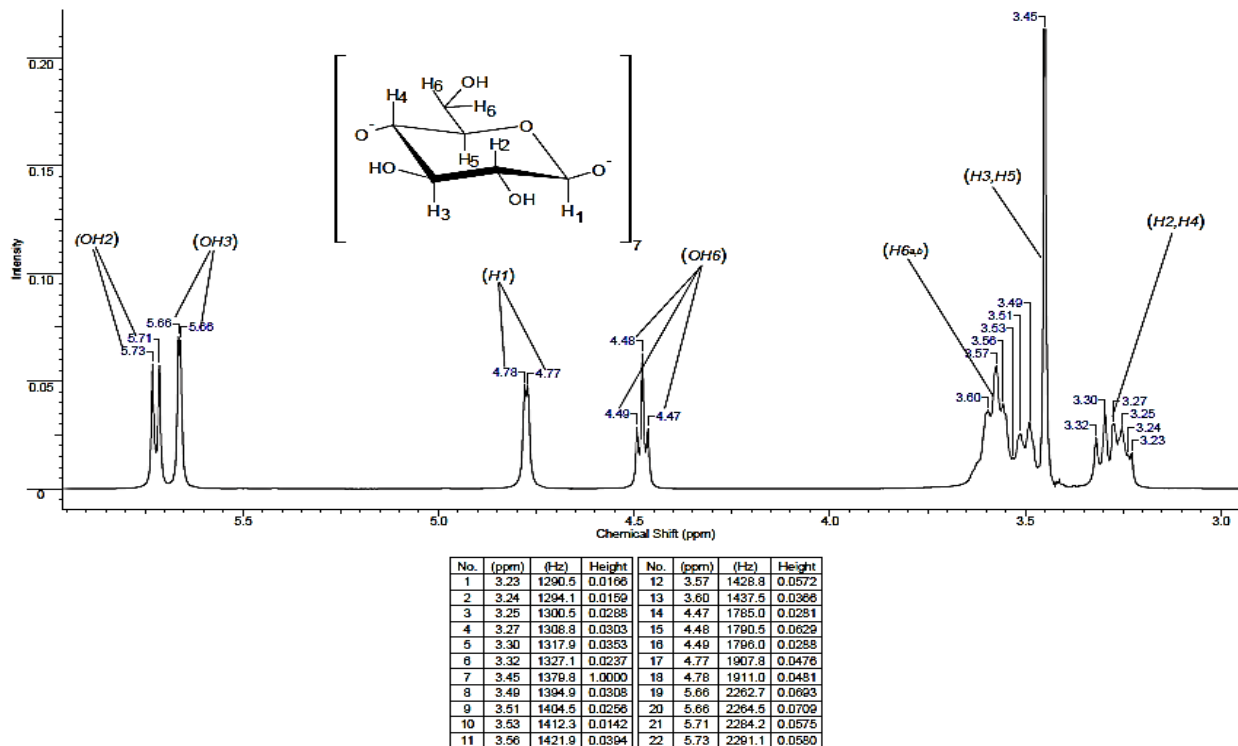

<sup>1</sup>H-NMR spectra of free β-CD (spectrometer JNM-ECA Jeol 400 operating at 400 MHz (frequency 399.78) (25°C)

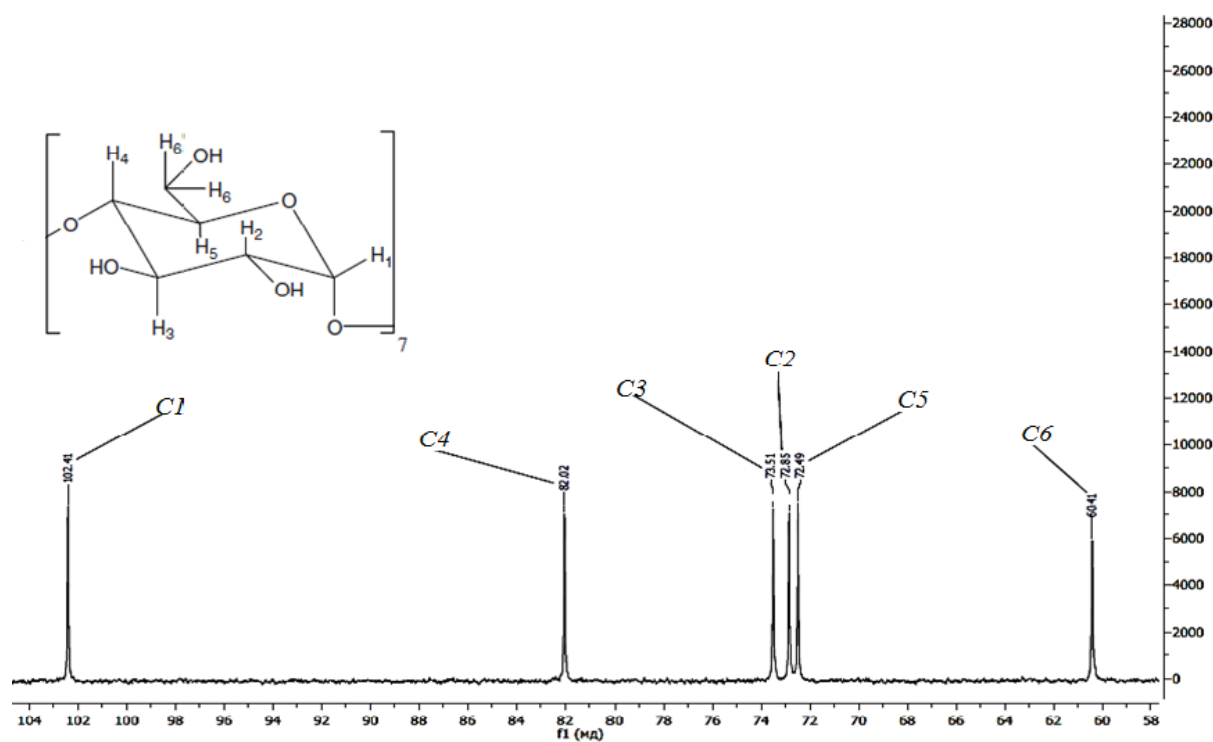

$^{13}\text{C}$  NMR spectra of free  $\beta$ -CD

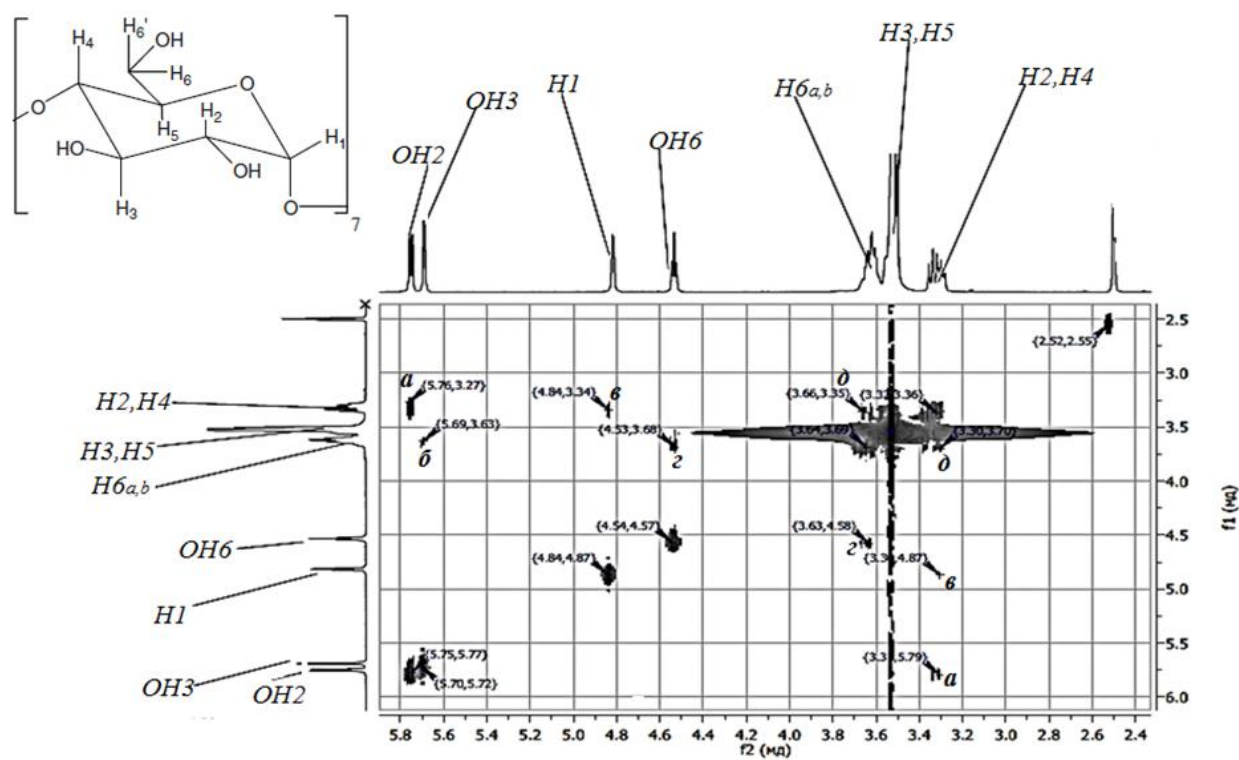

COSY ( $^1\text{H}$ - $^1\text{H}$ ) spectra of  $\beta$ -CD

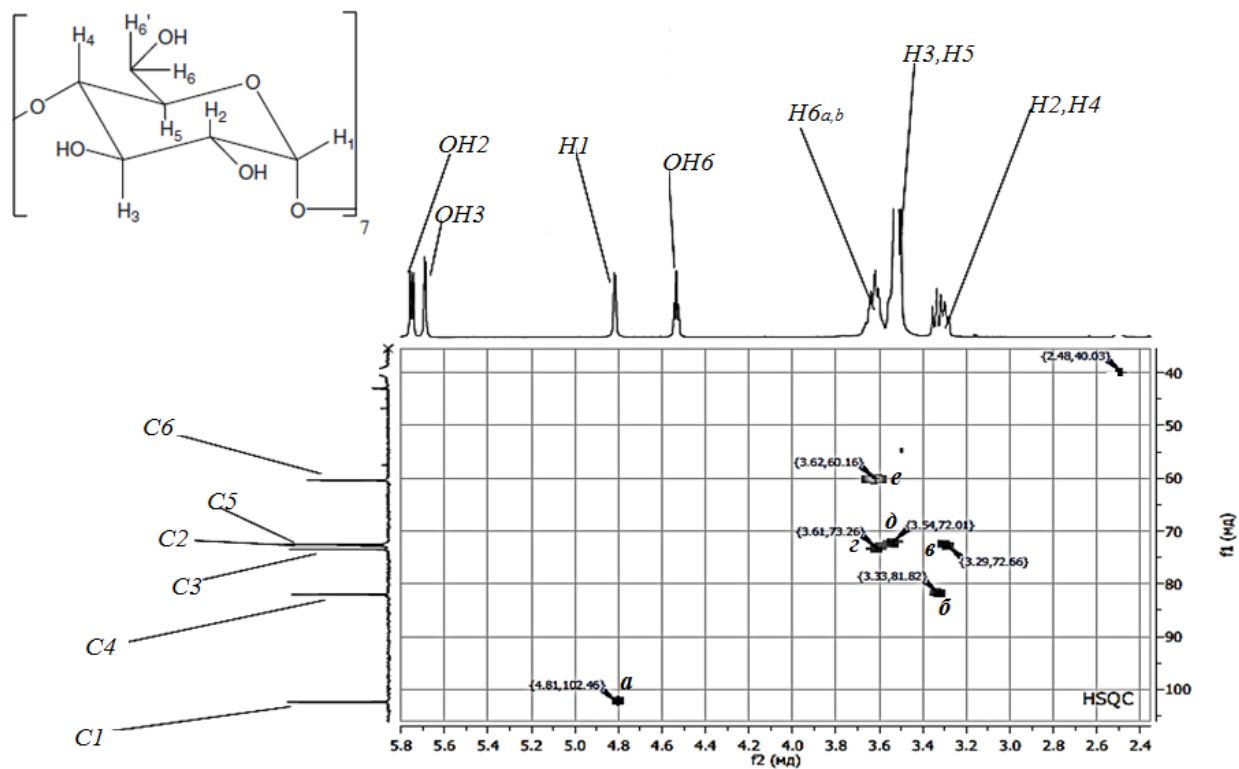

HSQC ( $^1\text{H}$ - $^{13}\text{C}$ ) spectra of  $\beta$ -CD



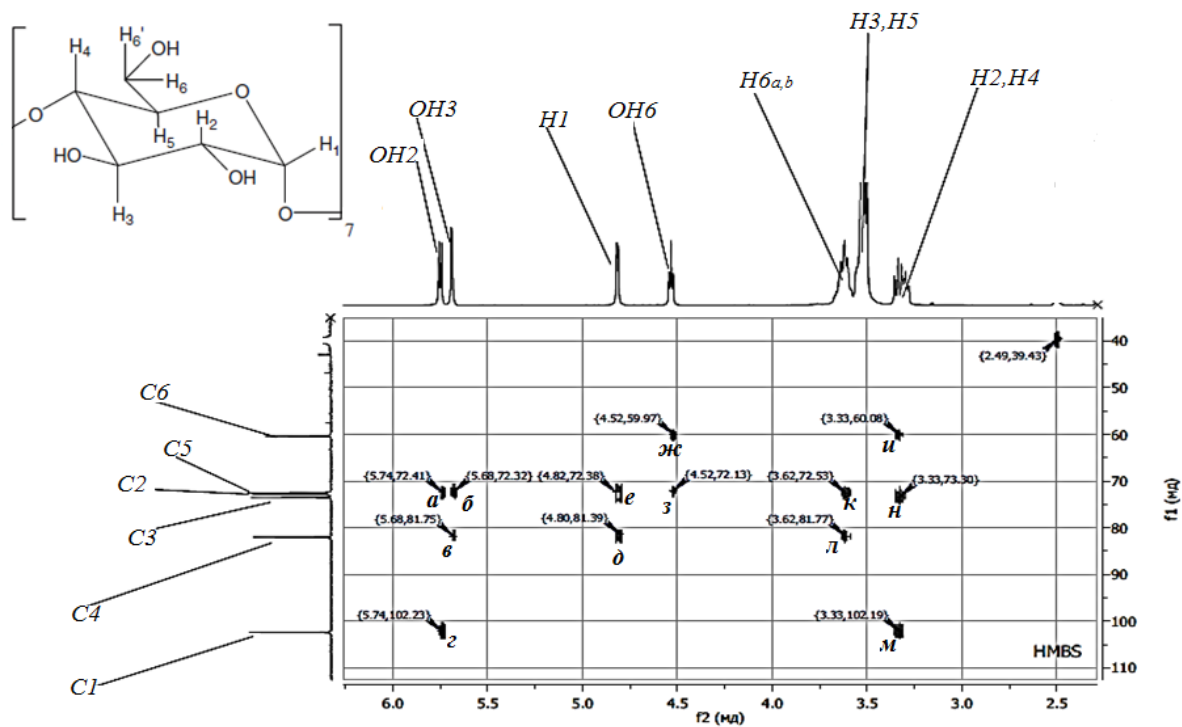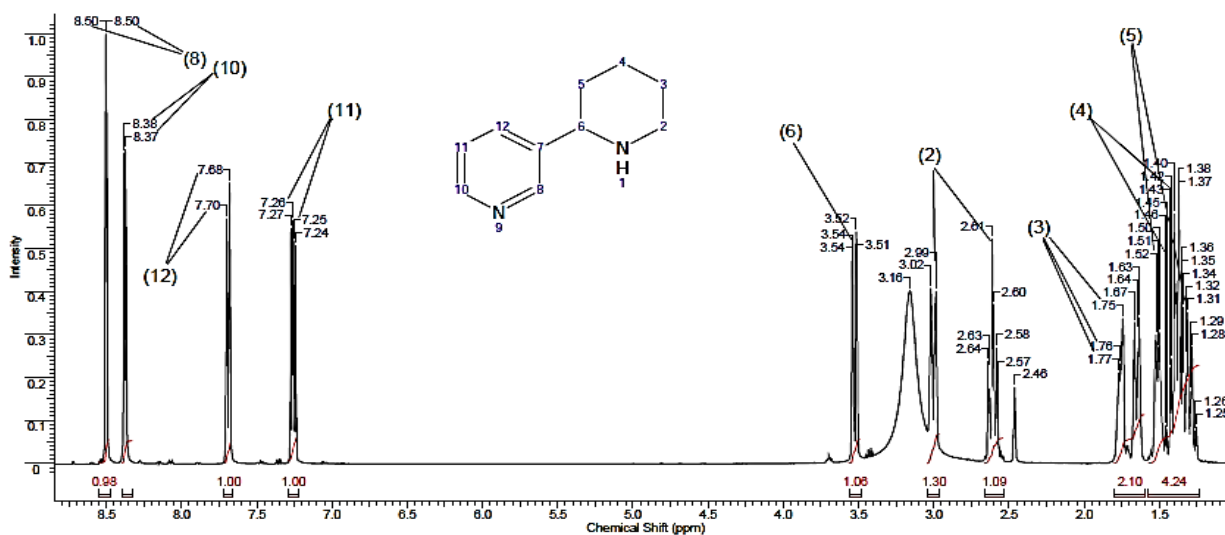

| No. | (ppm) | (Hz)  | Height | No. | (ppm) | (Hz)  | Height | No. | (ppm) | (Hz)   | Height | No. | (ppm) | (Hz)   | Height |
|-----|-------|-------|--------|-----|-------|-------|--------|-----|-------|--------|--------|-----|-------|--------|--------|
| 1   | 1.25  | 500.5 | 0.0852 | 14  | 1.42  | 568.3 | 0.2450 | 27  | 2.46  | 985.0  | 0.1787 | 40  | 3.54  | 1413.7 | 0.4358 |
| 2   | 1.26  | 503.7 | 0.0756 | 15  | 1.43  | 571.5 | 0.2238 | 28  | 2.47  | 986.8  | 0.1279 | 41  | 3.54  | 1416.4 | 0.4722 |
| 3   | 1.28  | 512.9 | 0.2695 | 16  | 1.45  | 580.6 | 0.0806 | 29  | 2.57  | 1026.4 | 0.1818 | 42  | 7.24  | 2895.1 | 0.5074 |
| 4   | 1.29  | 515.6 | 0.1714 | 17  | 1.46  | 583.9 | 0.0895 | 30  | 2.58  | 1032.2 | 0.2697 | 43  | 7.25  | 2900.2 | 0.5184 |
| 5   | 1.31  | 523.9 | 0.3527 | 18  | 1.50  | 600.3 | 0.3069 | 31  | 2.60  | 1040.9 | 0.3696 | 44  | 7.26  | 2902.9 | 0.5655 |
| 6   | 1.32  | 527.5 | 0.2542 | 19  | 1.51  | 602.6 | 0.2694 | 32  | 2.61  | 1043.6 | 0.5222 | 45  | 7.27  | 2907.9 | 0.5479 |
| 7   | 1.34  | 535.8 | 0.3644 | 20  | 1.52  | 608.6 | 0.2995 | 33  | 2.63  | 1052.8 | 0.2235 | 46  | 7.68  | 3070.0 | 0.6532 |
| 8   | 1.35  | 539.0 | 0.3707 | 21  | 1.63  | 653.5 | 0.3399 | 34  | 2.64  | 1055.5 | 0.2376 | 47  | 7.70  | 3077.8 | 0.5702 |
| 9   | 1.36  | 542.2 | 0.1616 | 22  | 1.64  | 656.2 | 0.3118 | 35  | 2.99  | 1193.4 | 0.4004 | 48  | 8.37  | 3345.3 | 0.7138 |
| 10  | 1.37  | 547.2 | 0.6262 | 23  | 1.67  | 665.8 | 0.3291 | 36  | 3.02  | 1207.1 | 0.4081 | 49  | 8.37  | 3347.1 | 0.7305 |
| 11  | 1.38  | 560.4 | 0.4975 | 24  | 1.75  | 697.9 | 0.3372 | 37  | 3.16  | 1263.0 | 0.4014 | 50  | 8.38  | 3350.3 | 0.7231 |
| 12  | 1.39  | 568.4 | 0.5110 | 25  | 1.76  | 704.3 | 0.2316 | 38  | 3.51  | 1403.1 | 0.4795 | 51  | 8.50  | 3397.5 | 0.9992 |
| 13  | 1.40  | 569.1 | 0.5819 | 26  | 1.77  | 707.5 | 0.2118 | 39  | 3.52  | 1405.4 | 0.5393 | 52  | 8.50  | 3399.8 | 1.0000 |

| No. | (ppm)          | Value | Absolute Value |
|-----|----------------|-------|----------------|
| 1   | [1.23 .. 1.57] | 4.242 | 7.42340e+1     |
| 2   | [1.60 .. 1.80] | 2.088 | 3.67186e+1     |
| 3   | [2.54 .. 2.66] | 1.090 | 1.90737e+1     |
| 4   | [2.96 .. 3.04] | 1.298 | 2.27171e+1     |
| 5   | [3.49 .. 3.55] | 1.059 | 1.85290e+1     |
| 6   | [7.23 .. 7.29] | 1.000 | 1.74983e+1     |
| 7   | [7.66 .. 7.72] | 0.999 | 1.74765e+1     |
| 8   | [8.33 .. 8.39] | 0.968 | 1.69450e+1     |
| 9   | [8.48 .. 8.56] | 0.984 | 1.72214e+1     |

$^1\text{H}$  NMR spectra of anabazine (spectrometer JNM-ECA Jeol 400 operating at 400 MHz (frequency 399.78) ( $25^\circ\text{C}$ ),  $\text{DMSO}-d_6$ )

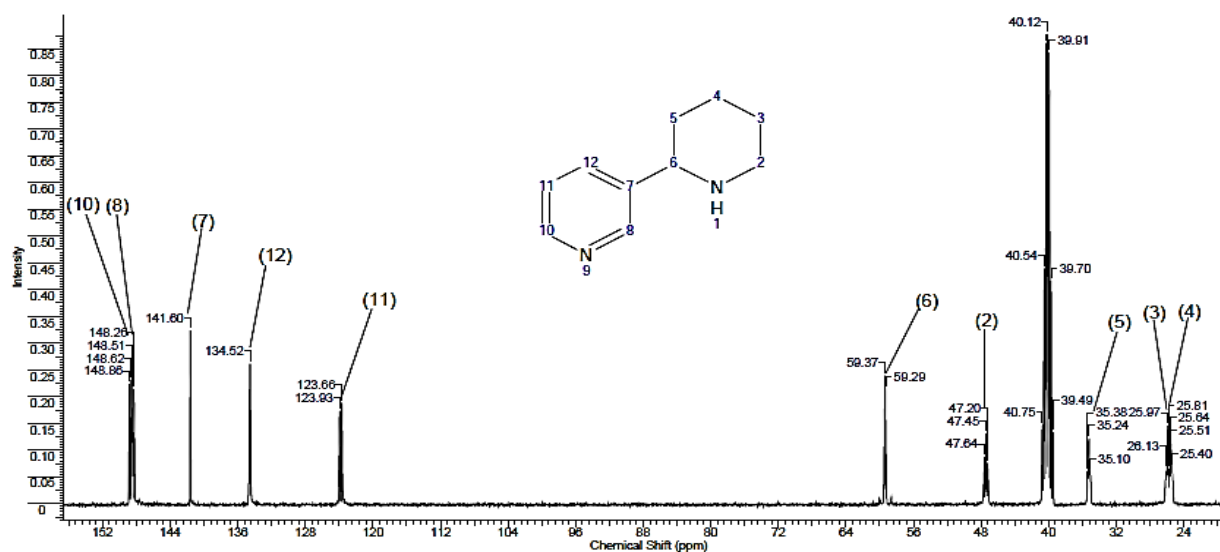

| No. | (ppm) | (Hz)   | Height | No. | (ppm) | (Hz)   | Height | No. | (ppm)  | (Hz)    | Height |
|-----|-------|--------|--------|-----|-------|--------|--------|-----|--------|---------|--------|
| 1   | 25.40 | 2553.5 | 0.0701 | 12  | 39.91 | 4012.3 | 0.8428 | 23  | 123.66 | 12430.5 | 0.1885 |
| 2   | 25.51 | 2564.0 | 0.1128 | 13  | 40.12 | 4033.4 | 1.0000 | 24  | 123.93 | 12458.3 | 0.1738 |
| 3   | 25.64 | 2577.4 | 0.0656 | 14  | 40.33 | 4054.4 | 0.8610 | 25  | 134.52 | 13523.1 | 0.2612 |
| 4   | 25.81 | 2594.7 | 0.0647 | 15  | 40.54 | 4075.5 | 0.4392 | 26  | 134.61 | 13531.8 | 0.2608 |
| 5   | 25.97 | 2611.0 | 0.1457 | 16  | 40.75 | 4096.6 | 0.1464 | 27  | 141.60 | 14234.3 | 0.3237 |
| 6   | 26.13 | 2626.3 | 0.0647 | 17  | 47.20 | 4744.5 | 0.0759 | 28  | 148.26 | 14904.3 | 0.2150 |
| 7   | 35.10 | 3528.2 | 0.0599 | 18  | 47.38 | 4762.8 | 0.0657 | 29  | 148.51 | 14929.2 | 0.2150 |
| 8   | 35.24 | 3542.6 | 0.1220 | 19  | 47.45 | 4769.5 | 0.1307 | 30  | 148.62 | 14939.8 | 0.2320 |
| 9   | 35.33 | 3557.0 | 0.0612 | 20  | 47.64 | 4788.8 | 0.0872 | 31  | 148.86 | 14963.7 | 0.2239 |
| 10  | 39.49 | 3970.1 | 0.1349 | 21  | 59.29 | 5959.9 | 0.2138 |     |        |         |        |
| 11  | 39.70 | 3991.2 | 0.4162 | 22  | 59.37 | 5968.5 | 0.2382 |     |        |         |        |

<sup>13</sup>H NMR spectra of anabazine (spectrometer JNM-ECA Jeol 400 operating at 400 MHz (frequency 399.78) (25°C), DMSO-d<sub>6</sub>)

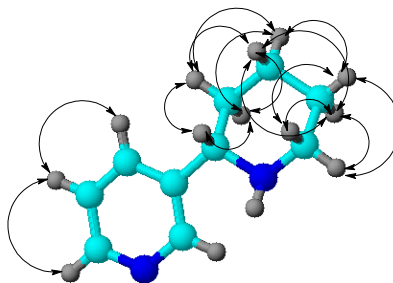

a

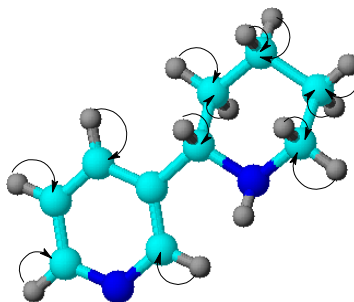

b

Correlations of COSY ( $^1\text{H}$ - $^1\text{H}$ ) and HMQC ( $^1\text{H}$ - $^{13}\text{C}$ ) in the anabazine molecule

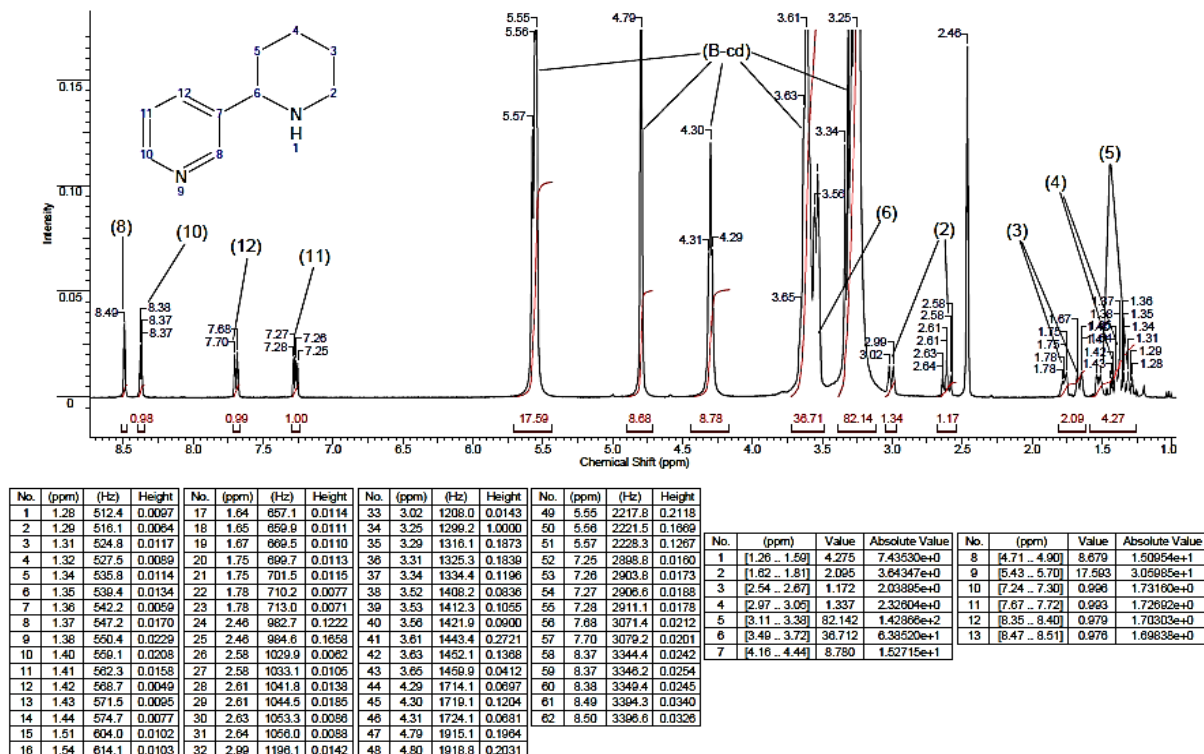

$^1\text{H}$  NMR spectra of anabazine inclusion complex with  $\beta$ -CD (spectrometer JNM-ECA Jeol 400 operating at 400 MHz (frequency 399.78) (25°C), DMSO- $d_6$ )

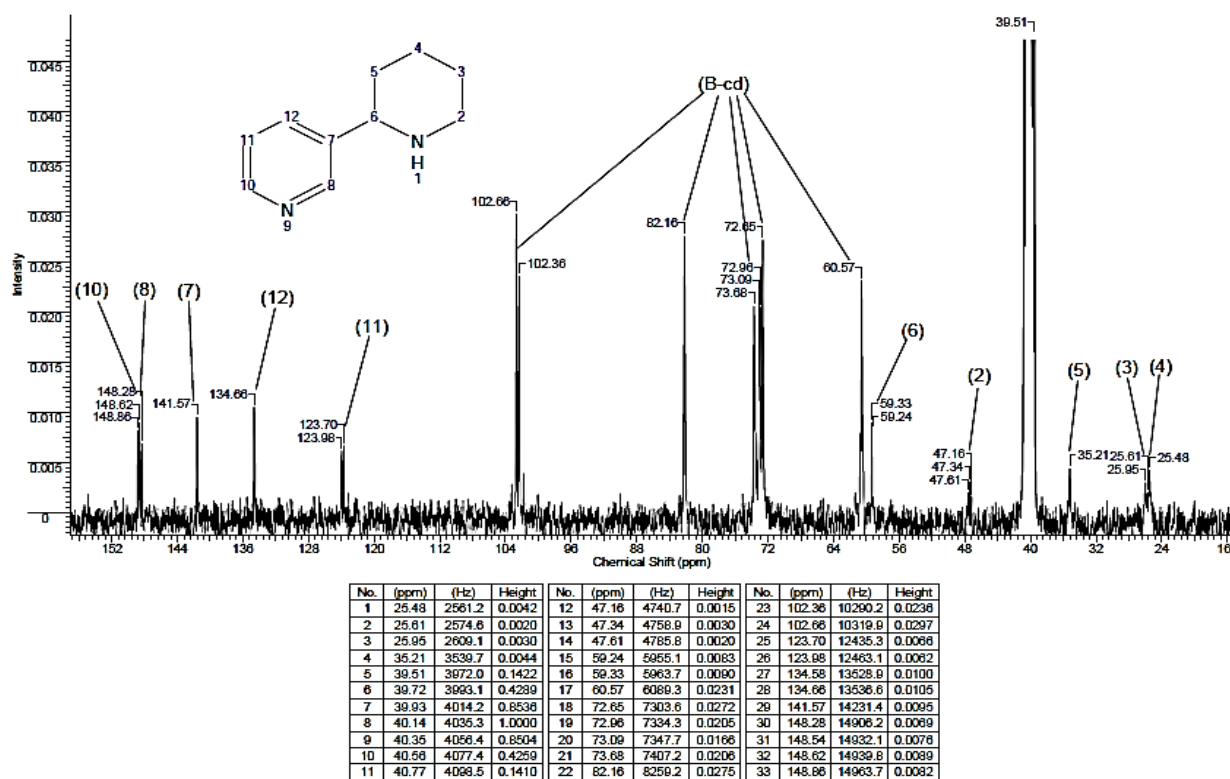

<sup>13</sup>C NMR spectra of anabazine inclusion complex with  $\beta$ -CD (spectrometer JNM-ECA Jeol 400 operating at 400 MHz (frequency 399.78) (25°C), DMSO-d<sub>6</sub>)

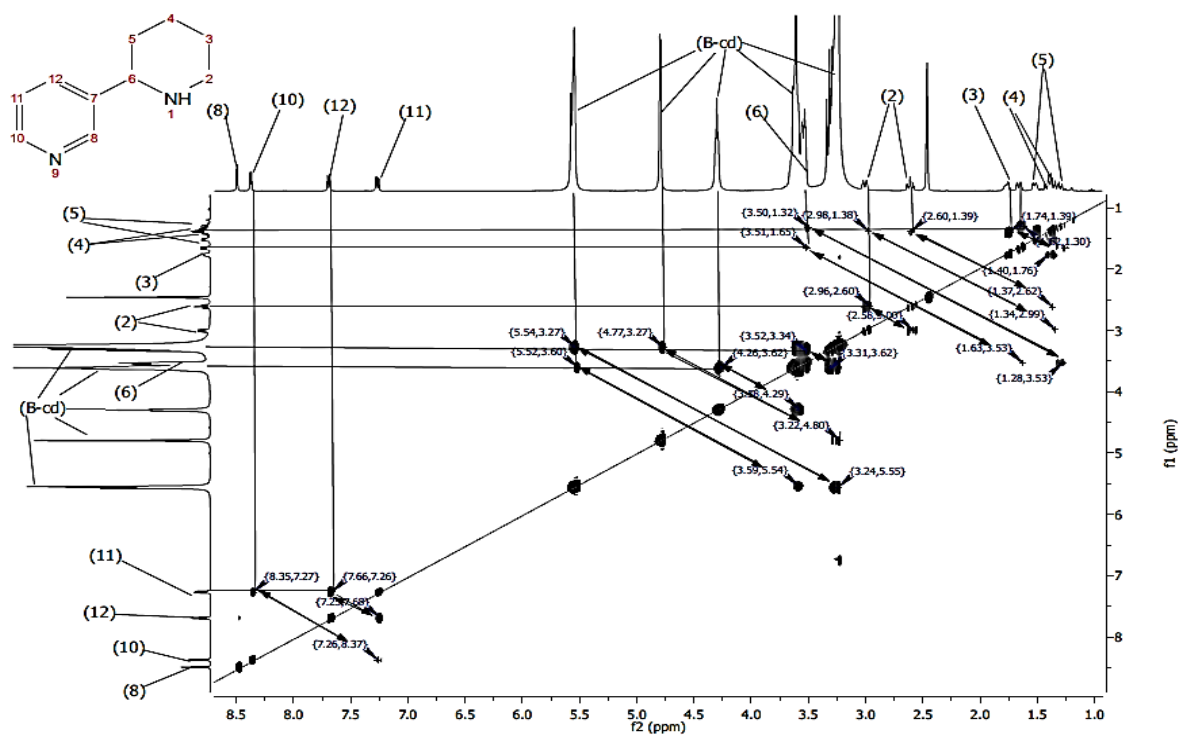

COSY ( $^1\text{H}$ - $^1\text{H}$ ) spectra of anabazine inclusion complex with  $\beta$ -CD

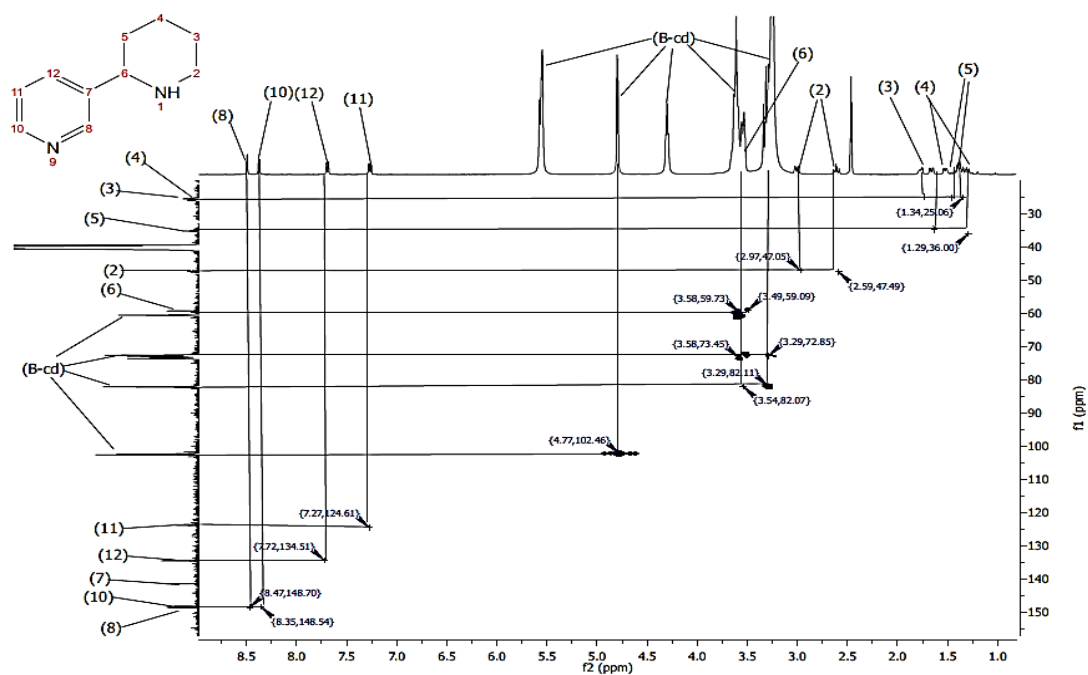

HMQC ( $^1\text{H}$ - $^{13}\text{C}$ ) spectra of anabazine inclusion complex with  $\beta$ -CD

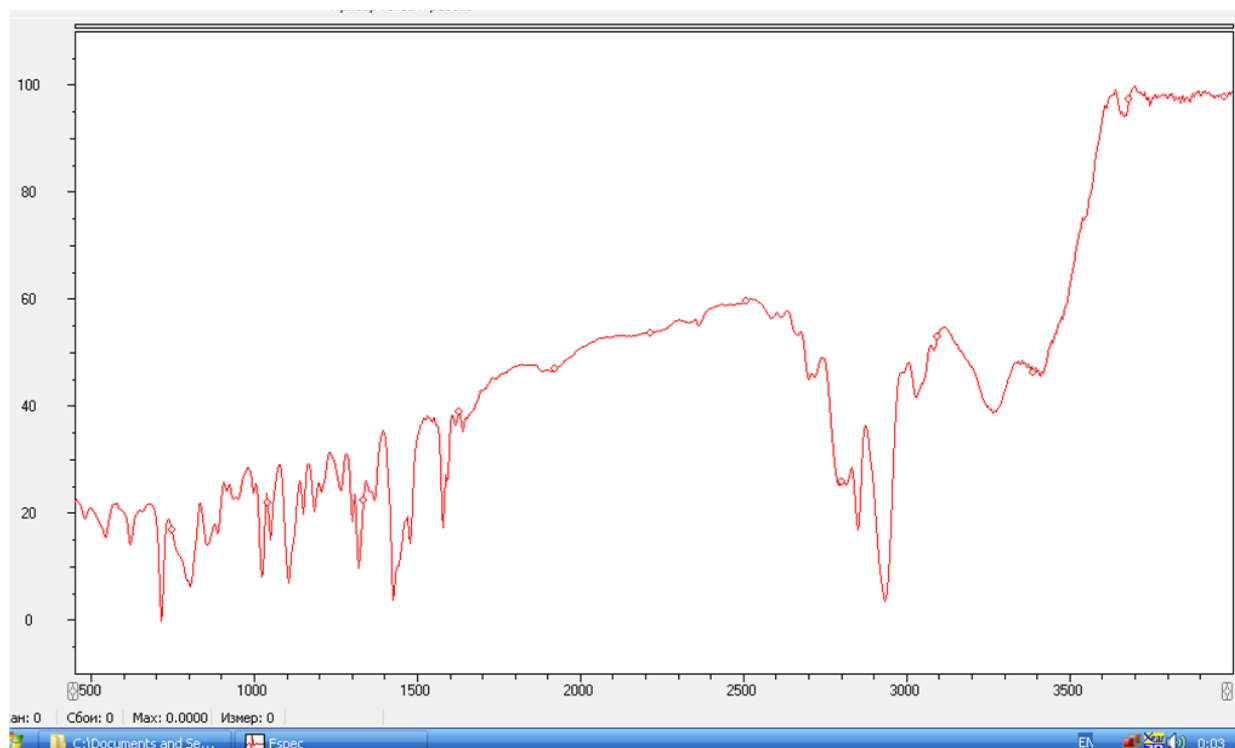

IR spectrum of anabazine alkaloid

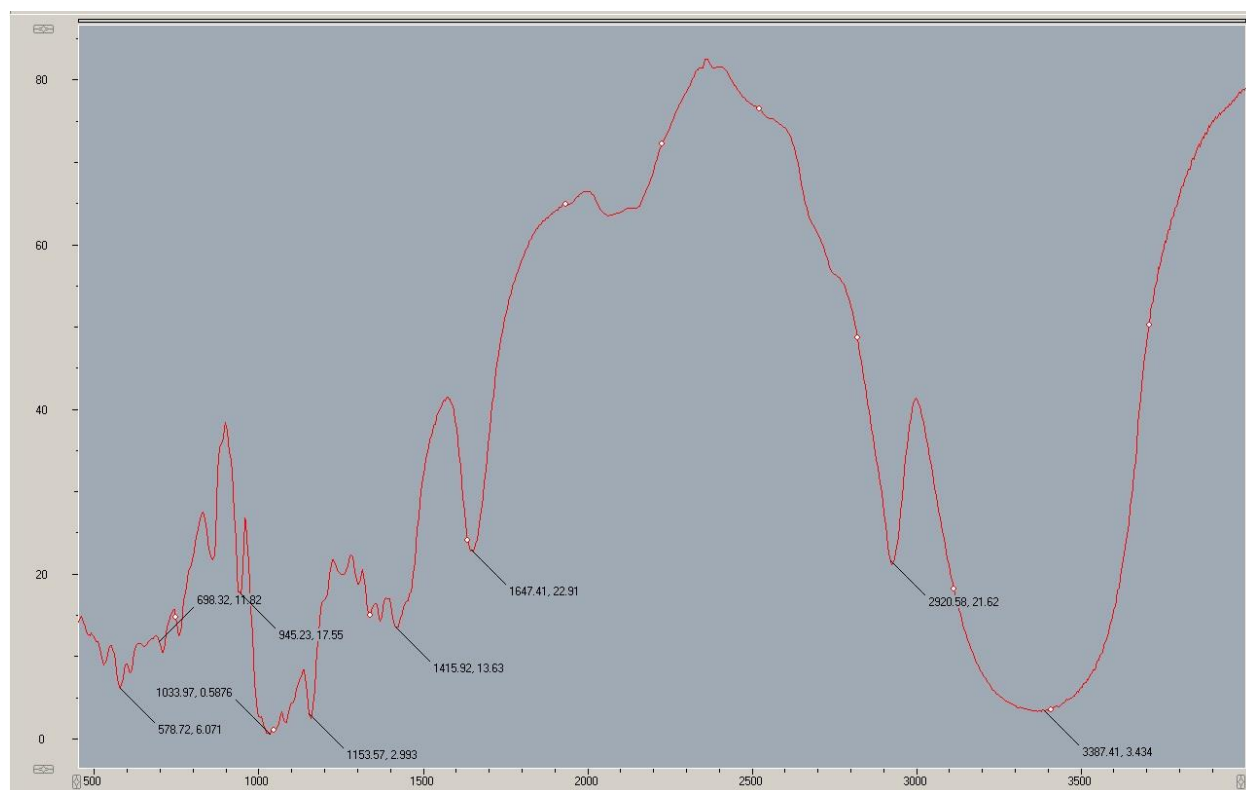

IR spectrum of beta-cyclodextrin

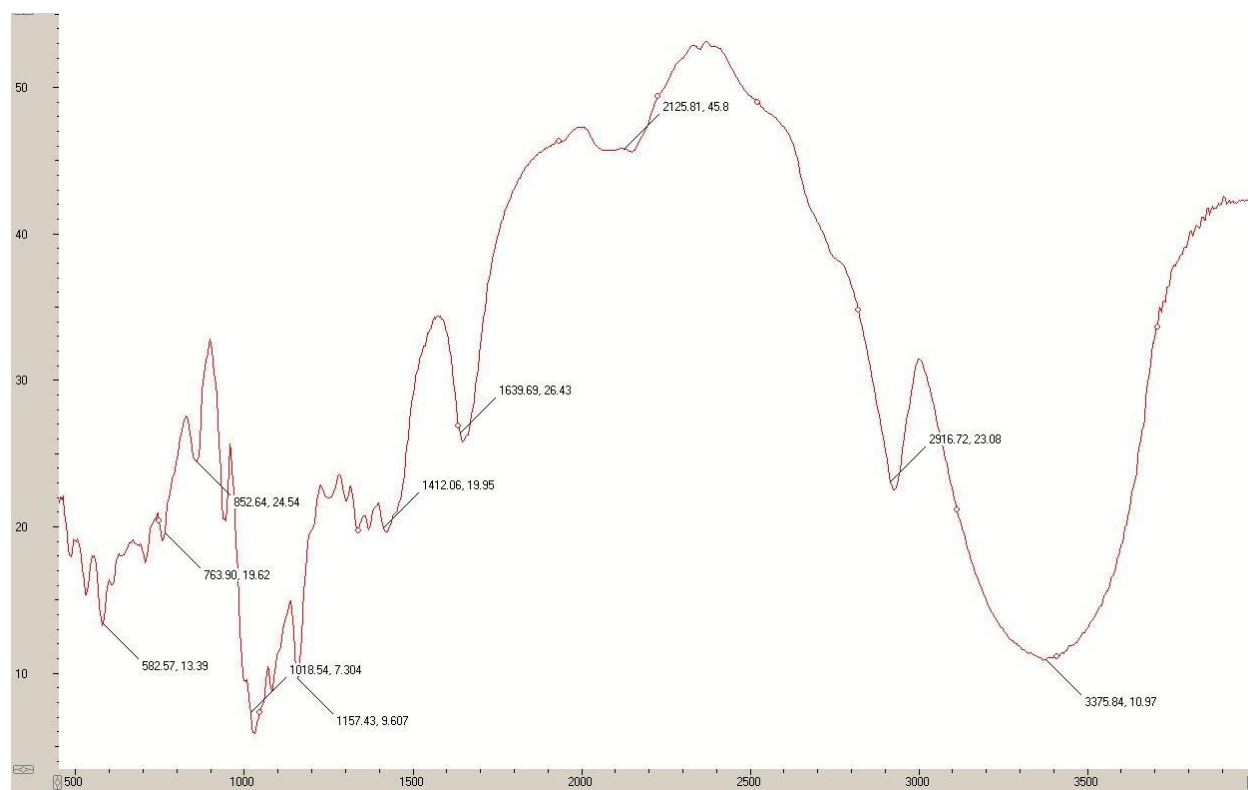

IR spectrum of the Anabazine-beta-cyclodextrin inclusion complex
